# Supplementary material
Source: PubMed Central journal article supplement (PMC4042165)
Supplement: cr201428x1.pdf [file cr201428x1.pdf]

**Supplementary Information, Table S1. Bioactivities of compound K vs. those of PPD-type ginsenosides.**

| Bioactivities                          | PPD-type ginsenosides | References | compound K | References |
|----------------------------------------|-----------------------|------------|------------|------------|
| Anti-cancer                            | +                     | [1, 2]     | +          | [3, 4]     |
| Anti-inflammation                      | +                     | [5]        | +          | [5-7]      |
| Hepatoprotection                       | +                     | [8]        | +          | [8, 9]     |
| Anti-diabetes                          | +                     | [10]       | +          | [10-12]    |
| Anti-stress                            | +                     | [13]       | +          | [14]       |
| Anti-aging, anti-oxidation             | +                     | [15, 16]   | +          | [17]       |
| Ameliorate side effect of chemotherapy | -                     |            | +          | [18]       |

+, related bioactivity was reported

-, no related report

**References**

- 1 Sato K, Mochizuki M, Saiki I, Yoo YC, Samukawa K, Azuma I. Inhibition of tumor angiogenesis and metastasis by a saponin of *Panax ginseng*, ginsenoside-Rb2. *Biol Pharma Bull* 1994; **17**:635-639.
- 2 Oh S-H, Lee B-H. A ginseng saponin metabolite-induced apoptosis in HepG2 cells involves a mitochondria-mediated pathway and its downstream caspase-8 activation and Bid cleavage. *Toxicol Appl Pharmacol* 2004; **194**:221-229.
- 3 Wakabayashi C, Murakami K, Hasegawa H, Murata J, Saiki I. An intestinal bacterial metabolite of ginseng protopanaxadiol saponins has the ability to induce apoptosis in tumor cells. *Biochem Biophys Res Commun* 1998; **246**:725-730.
- 4 Park E-S, Jung SH, Lee D-Y, Won KJ, Yun Y-P, Kim B. Compound K, an intestinal metabolite of ginsenosides, inhibits PDGF-BB-induced VSMC proliferation and migration through G1 arrest and attenuates neointimal hyperplasia after arterial injury. *Atherosclerosis* 2013; **228**:53-60.
- 5 Park E-K, Shin Y-W, Lee H-U *et al.* Inhibitory effect of ginsenoside Rb1 and compound K on NO and prostaglandin E2 biosyntheses of RAW264. 7 cells induced by lipopolysaccharide. *Biol Pharm Bull* 2005; **28**:652-656.
- 6 Park J-S, Shin JA, Jung J-S *et al.* Anti-inflammatory mechanism of compound K in activated microglia and its neuroprotective effect on experimental stroke in mice. *J Pharmacol Exp Therap* 2012; **341**:59-67.

- 7 Shin Y-W, Bae E-A, Kim S-S, Lee Y-C, Kim D-H. Effect of ginsenoside Rb1 and compound K in chronic oxazolone-induced mouse dermatitis. *Int Immunopharmacol* 2005; **5**:1183-1191.
- 8 Lee HU, Bae EA, Han MJ, Kim NJ, Kim DH. Hepatoprotective effect of ginsenoside Rb1 and compound K on tert-butyl hydroperoxide-induced liver injury. *Liver Int* 2005; **25**:1069-1073.
- 9 Kim DY, Yuan HD, Chung IK, Chung SH. Compound K, intestinal metabolite of ginsenoside, attenuates hepatic lipid accumulation via AMPK activation in human hepatoma cells. *J Agric Food Chem* 2009; **57**:1532-1537.
- 10 Li W, Zhang M, Gu J *et al.* Hypoglycemic effect of protopanaxadiol-type ginsenosides and compound K on Type 2 Diabetes mice induced by High-Fat Diet combining with Streptozotocin via suppression of hepatic gluconeogenesis. *Fitoterapia* 2012; **83**:192-198.
- 11 Han GC, Ko SK, Sung JH, Chung SH. Compound K enhances insulin secretion with beneficial metabolic effects in db/db mice. *J Agric Food Chem* 2007; **55**:10641-10648.
- 12 Yoon SH, Han EJ, Sung JH, Chung SH. Anti-diabetic effects of compound K versus metformin versus compound K-metformin combination therapy in diabetic db/db mice. *Biol Pharm Bull* 2007; **30**:2196-2200.
- 13 Lee SH, Jung BH, Kim SY, Lee EH, Chung BC. The antistress effect of ginseng total saponin and ginsenoside Rg3 and Rb1 evaluated by brain polyamine level under immobilization stress. *Pharmacol Res* 2006; **54**:46-49.
- 14 Kim D-H, Jung J-S, Moon Y-S *et al.* Inhibition of intracerebroventricular injection stress-induced plasma corticosterone levels by intracerebroventricularly administered compound K, a ginseng saponin metabolite, in mice. *Biol Pharm Bull* 2003; **26**:1035-1038.
- 15 Yokozawa T, Satoh A, Cho EJ. Ginsenoside-Rd attenuates oxidative damage related to aging in senescence-accelerated mice. *J Pharma Pharmacol* 2004; **56**:107-113.
- 16 Liu Z-Q. Chemical insights into ginseng as a resource for natural antioxidants. *Chem Rev* 2012; **112**:3329-3355.
- 17 Lee N-J, Lee JW, Sung JH, Lee Y-J, Kang J-K. In vitro antioxidant properties of a ginseng intestinal metabolite IH-901. *Lab Anim Res* 2011; **27**:227-234.
- 18 Hou J-g, Xue J-j, Lee M-r *et al.* Compound K is able to ameliorate the impaired cognitive function and hippocampal neurogenesis following chemotherapy treatment. *Biochem Biophys Res Commun* 2013.
