# Supplementary material
Source: PubMed Central journal article supplement (PMC4042165)
Supplement: cr201428x2.pdf [file cr201428x2.pdf]

**Supplementary Information, Table S2. Datasets for construction of Genus *Panax* cDNA database**

| <b>Dataset<sup>a</sup></b> | <b>Plant</b>               | <b>Organ</b>            | <b>Year-old</b> | <b>Sampling location</b> | <b>Sequence method</b> | <b>Bases/reads</b> | <b>References</b> |
|----------------------------|----------------------------|-------------------------|-----------------|--------------------------|------------------------|--------------------|-------------------|
| SRS006698                  | <i>Panax quinquefolius</i> | root                    | 4               | Beijing                  | 454                    | 113.4M             | [1]               |
| SRX017444                  | <i>Panax notoginseng</i>   | root                    | 4               | Yunnan province          | 454                    | 99.9M              | [2]               |
| SRS024769                  | <i>Panax ginseng</i>       | root                    | 11              | Liaoning province        | 454                    | 116.9M             | [3]               |
| ERS093423 <sup>b</sup>     | <i>Panax ginseng</i>       | root                    | 5               | Ji Lin province          | HiSeq 2000             | 3.6G               | /                 |
| ERS088918 <sup>b</sup>     | <i>Panax ginseng</i>       | stem                    | 5               | Ji Lin province          | HiSeq 2000             | 3.5G               | /                 |
| ERS088917 <sup>b</sup>     | <i>Panax ginseng</i>       | leaf                    | 5               | Ji Lin province          | HiSeq 2000             | 3.5G               | /                 |
| LIBEST_018294              | <i>Panax ginseng</i>       | leaf                    | /               | /                        | Sanger                 | 3160 reads         | [4]               |
| LIBEST_026760              | <i>Panax ginseng</i>       | root                    | /               | /                        | Sanger                 | 4226 reads         | [5]               |
| LIBEST_015794              | <i>Panax ginseng</i>       | MeJA treated hairy root | /               | /                        | Sanger                 | 3135 reads         | [6]               |

<sup>a</sup> accession number for SRA (Sequence Read Archive) or number for cDNA library in NCBI (<http://www.ncbi.nlm.nih.gov/>).

<sup>b</sup> These datasets were available from DNA Data Bank of Japan (<http://www.ddbj.nig.ac.jp/searches-e.html>)

## References

- 1 Sun C, Li Y, Wu Q *et al.* De novo sequencing and analysis of the American ginseng root transcriptome using a GS FLX Titanium platform to discover putative genes involved in ginsenoside biosynthesis. *BMC Genomics* 2010; **11**:262.
- 2 Luo H, Sun C, Sun Y *et al.* Analysis of the transcriptome of *Panax notoginseng* root uncovers putative triterpene saponin-biosynthetic genes and genetic markers. *BMC Genomics* 2011; **12**:S5.
- 3 Chen S, Luo H, Li Y *et al.* 454 EST analysis detects genes putatively involved in ginsenoside biosynthesis in *Panax ginseng*. *Plant Cell Rep* 2011; **30**:1593-1601.
- 4 Kim MK, Lee B-S, In J-G, Sun H, Yoon J-H, Yang D-C. Comparative analysis of expressed sequence tags (ESTs) of ginseng leaf. *Plant Cell Rep* 2006; **25**:599-606.
- 5 Han J-Y, Kim H-J, Kwon Y-S, Choi Y-E. The Cyt P450 enzyme CYP716A47 catalyzes the formation of protopanaxadiol from dammarenediol-II during ginsenoside biosynthesis in *Panax ginseng*. *Plant Cell Physiol* 2011; **52**:2062-2073.
- 6 Choi D-W, Jung J, Im Ha Y *et al.* Analysis of transcripts in methyl jasmonate-treated ginseng hairy roots to identify genes involved in the biosynthesis of ginsenosides and other secondary metabolites. *Plant Cell Rep* 2005; **23**:557-566.
