# Supplementary material
Source: PubMed Central journal article supplement (PMC4042165)
Supplement: cr201428x3.pdf [file cr201428x3.pdf]

**Supplementary Information, Table S3. Characterized terpene glycosyltransferases collected in CAZy and UniprotKB databases**

| Characterized terpene glycosyltransferases                      | Numbers        | reference |
|-----------------------------------------------------------------|----------------|-----------|
| Abscisic acid glycosyltransferase (sesquiterpenes)              | 1              | [1]       |
| limonoid UDP-glycosyltransferase (tetranortriterpenoids)        | 1              | [2]       |
| Steviol glycosyltransferase (diterpenes)                        | 1              | [3]       |
| Stevioside $\beta$ -glucosyltransferase (diterpenes)            | 1              | [3]       |
| Steviolbioside glycosyltransferase (diterpenes)                 | 1              | [3]       |
| Saponin glycosyltransferase (nootigenin)                        | 1              | [4]       |
| Triterpene UDP-glucosyl transferase (pentacyclic triterpenoids) | 4 <sup>a</sup> | [5-7]     |
| Soyasaponin III rhamnosyltransferase (soyasaponin)              | 1              | [8]       |
| Soyasapogenol B glucuronide galactosyltransferase (soyasaponin) | 1              | [8]       |
| Crocetin glycosyltransferase (tetraterpenes)                    | 2              | [9]       |

<sup>a</sup>, Eight glycosyltransferases which showed activity on different pentacyclic triterpenoids compounds *in vitro* had been identified. However, four of them identified in *Barbarea vulgaris* had not been collected in CAZy and UniprotKB databases [10].

## Reference

- 1 Priest DM, Jackson RG, Ashford DA, Abrams SR, Bowles DJ. The use of abscisic acid analogues to analyse the substrate selectivity of UGT71B6, a UDP-glycosyltransferase of *Arabidopsis thaliana*. *FEBS Lett* 2005; **579**:4454-4458.
- 2 Kita M, Hirata Y, Moriguchi T *et al.* Molecular cloning and characterization of a novel gene encoding limonoid UDP-glucosyltransferase in *Citrus*. *FEBS Lett* 2000; **469**:173-178.
- 3 Richman A, Swanson A, Humphrey T *et al.* Functional genomics uncovers three glucosyltransferases involved in the synthesis of the major sweet glucosides of *Stevia rebaudiana*. *Plant J* 2005; **41**:56-67.
- 4 Kohara A, Nakajima C, Hashimoto K *et al.* A novel glucosyltransferase involved in steroid saponin biosynthesis in *Solanum aculeatissimum*. *Plant Mol Biol* 2005; **57**:225-239.
- 5 Meesapyodsuk D, Balsevich J, Reed DW, Covello PS. Saponin biosynthesis in *Saponaria vaccaria*. cDNAs encoding  $\beta$ -amyrin synthase and a triterpene carboxylic acid glucosyltransferase. *Plant Physiol* 2007; **143**:959-969.
- 6 Naoumkina MA, Modolo LV, Huhman DV *et al.* Genomic and coexpression analyses predict multiple genes involved in triterpene saponin biosynthesis in *Medicago truncatula*. *Plant Cell* 2010; **22**:850-866.
- 7 Achnine L, Huhman DV, Farag MA, Sumner LW, Blount JW, Dixon RA. Genomics-based selection and functional characterization of triterpene glycosyltransferases from the model legume *Medicago truncatula*. *Plant J* 2005; **41**:875-887.
- 8 Shibuya M, Nishimura K, Yasuyama N, Ebizuka Y. Identification and characterization of glycosyltransferases involved in the biosynthesis of soyasaponin I in *Glycine max*. *FEBS Lett* 2010; **584**:2258-2264.
- 9 Moraga AR, Nohales PF, Pérez JAF, Gómez-Gómez L. Glucosylation of the saffron apocarotenoid crocetin by a glucosyltransferase isolated from *Crocus sativus* stigmas. *Planta* 2004; **219**:955-966.
- 10 Augustin JM, Drok S, Shinoda T *et al.* UDP-glycosyltransferases from the UGT73C subfamily in *Barbarea vulgaris* catalyze saponin 3-O-glucosylation in saponin-mediated insect resistance. *Plant Physiol* 2012; **160**:1881-1895.
