# Supplementary material
Source: PubMed Central journal article supplement (PMC4042165)
Supplement: cr201428x4.pdf [file cr201428x4.pdf]

**Supplementary information, Table S4** Production of CK and its precursor products in four genetically engineered strains.

| <b>Strain</b> | <b>Carbon Source</b> | <b>Squalene<br/>µg/L</b> | <b>DM<br/>µg/L</b> | <b>PPD<br/>µg/L</b> | <b>DMG<br/>µg /L</b> | <b>CK<br/>µg/L</b> |
|---------------|----------------------|--------------------------|--------------------|---------------------|----------------------|--------------------|
| AK1           | galactose            | 522.0                    | 158.3              | 320.7               | 103.1                | 243.8              |
| AKE           | galactose            | 946.2                    | 330.7              | 759.0               | 359.4                | 1424.8             |
| BK1           | glucose              | 1172.7                   | 542.3              | 1058.5              | 237.3                | 155.4              |
| BKE           | glucose              | 80.1                     | 3421.6             | 2630.0              | 930.9                | 802.1              |
