# Supplementary material
Source: PubMed Central journal article supplement (PMC4042165)
Supplement: cr201428x5.pdf [file cr201428x5.pdf]

**Supplementary information, Table S5** The kinetic parameters of UGTPg1 towards PPD and DM as substrates

| substrates | $V_{max}$<br>(nmol/min/mg) | $K_m$<br>( $\mu\text{M}$ ) | $k_{cat}$<br>( $\text{s}^{-1}$ ) | $k_{cat}/K_m$<br>( $\mu\text{M}^{-1} \text{s}^{-1}$ ) |
|------------|----------------------------|----------------------------|----------------------------------|-------------------------------------------------------|
| PPD        | $254 \pm 13$               | $359 \pm 21$               | 9.4                              | 0.026                                                 |
| DM         | $423 \pm 14$               | $178 \pm 24$               | 12.7                             | 0.071                                                 |
