# Supplementary material
Source: PubMed Central journal article supplement (PMC4042165)
Supplement: cr201428x8.pdf [file cr201428x8.pdf]

A

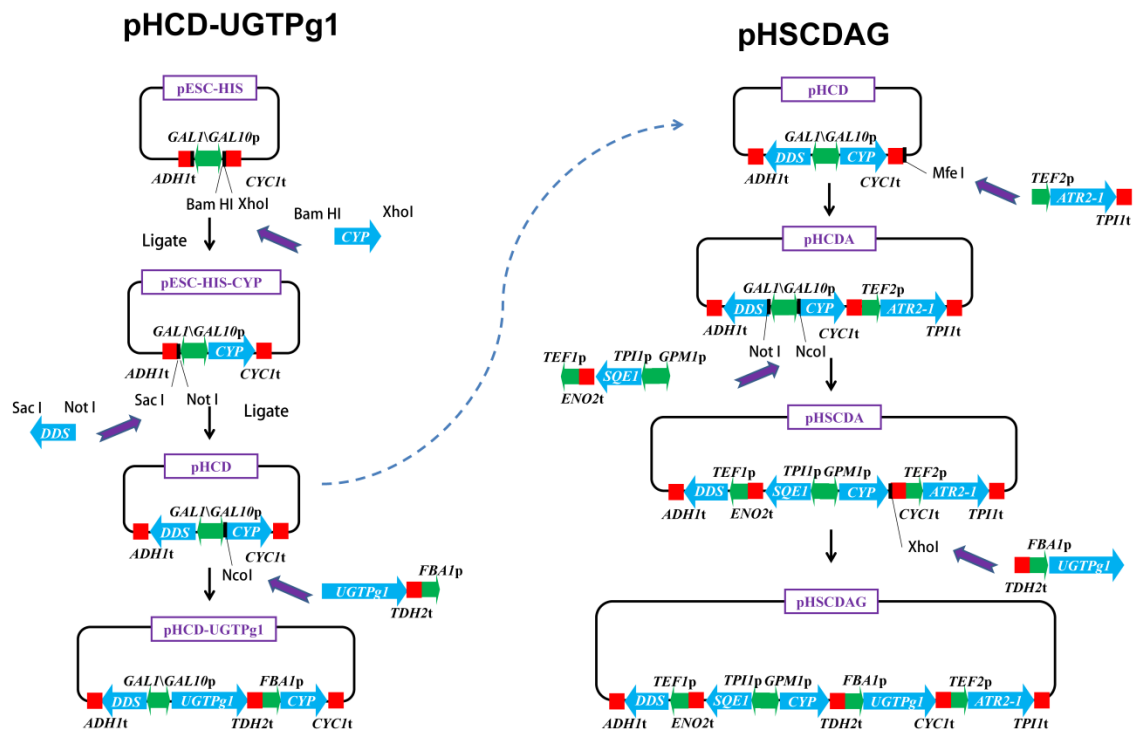

B

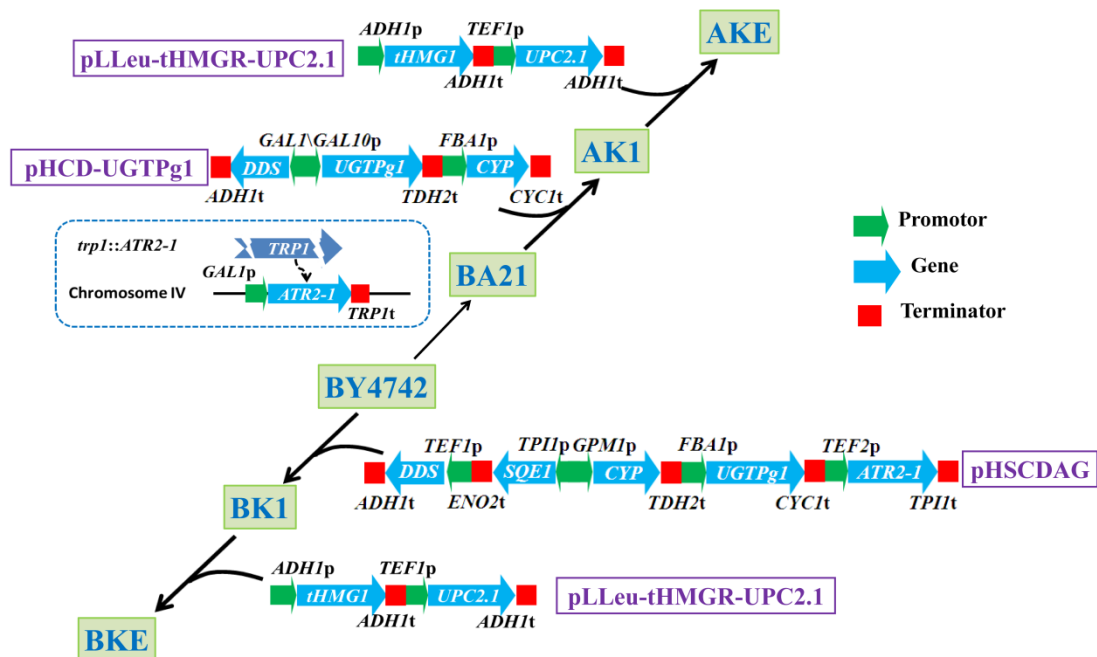

**Supplementary Information, Figure S3.** The construction of plasmids (A) and the recombinant yeast strains to yield CK (B) in this study.
