# Supplementary material
Source: PubMed Central journal article supplement (PMC4042165)
Supplement: cr201428x10.pdf [file cr201428x10.pdf]

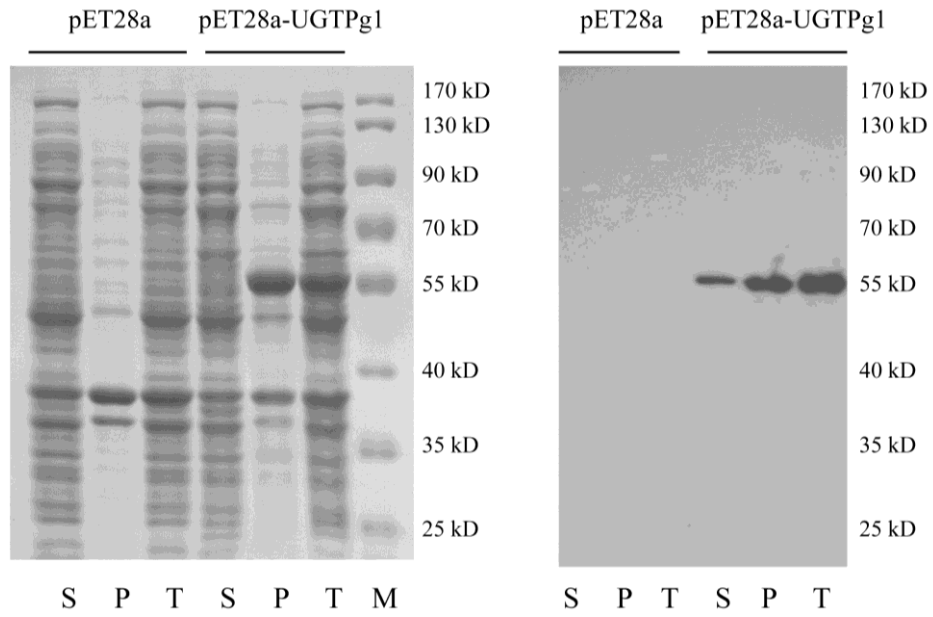

**Supplementary information, Figure S5** SDS-PAGE (left) and anti-6xHis Western blot (right) of the cell extract of the recombinant *E. coli* harboring pET28a and pET28a-UGTPg1.

T, total protein; S, soluble protein fraction; P, insoluble protein fraction; M, marker. The total protein and insoluble protein fraction for Western blot were diluted by ten folds.
