# Supplementary material
Source: PubMed Central journal article supplement (PMC4042165)
Supplement: cr201428x11.pdf [file cr201428x11.pdf]

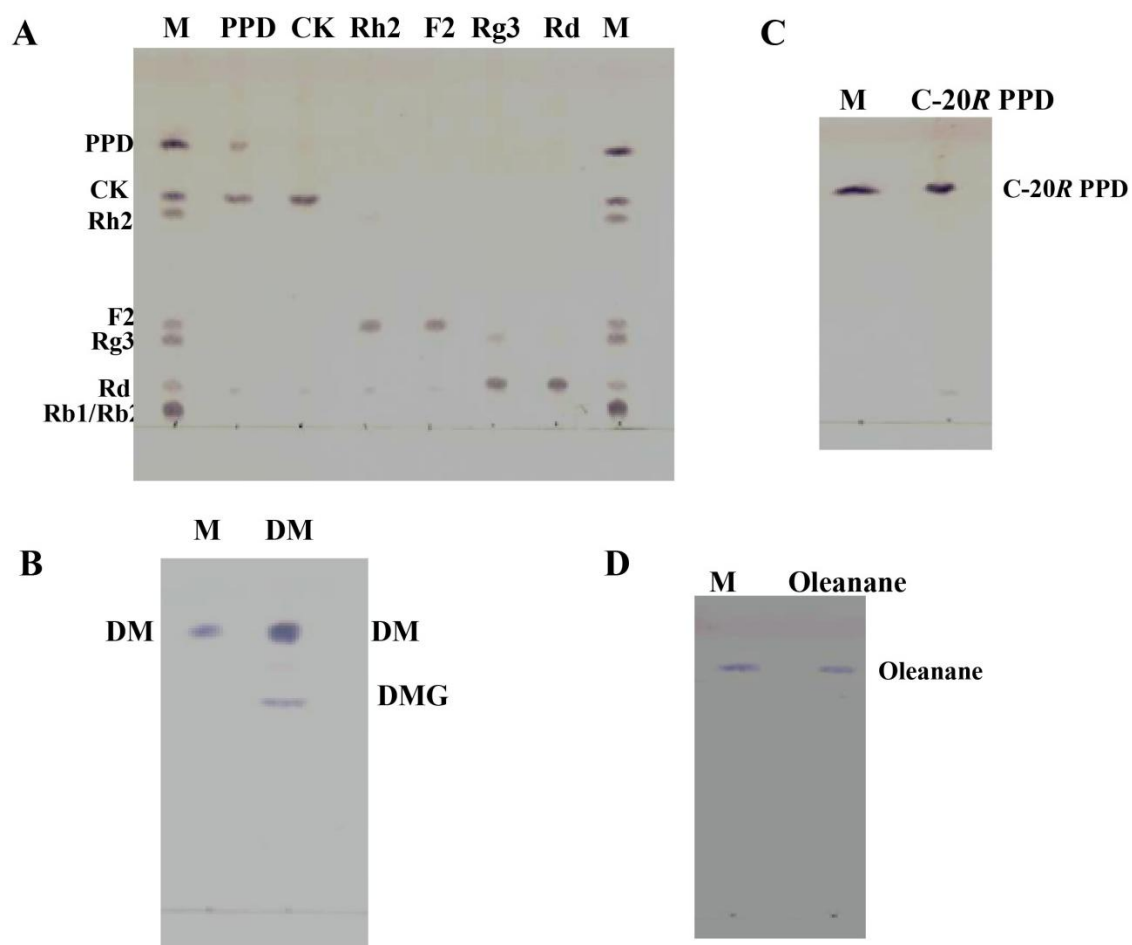

**Supplementary Information, Figure S6.** TLC analysis of reaction products catalyzed by UGTPg1 towards different substrates.

**A**, PPD-type ginsenosides as substrates; **B**, DM as substrates; **C**, C-20R PPD as substrates; **D**, oleanane as substrate. M: standard samples.
