# Supplementary material
Source: PubMed Central journal article supplement (PMC4042165)
Supplement: cr201428x12.pdf [file cr201428x12.pdf]

A

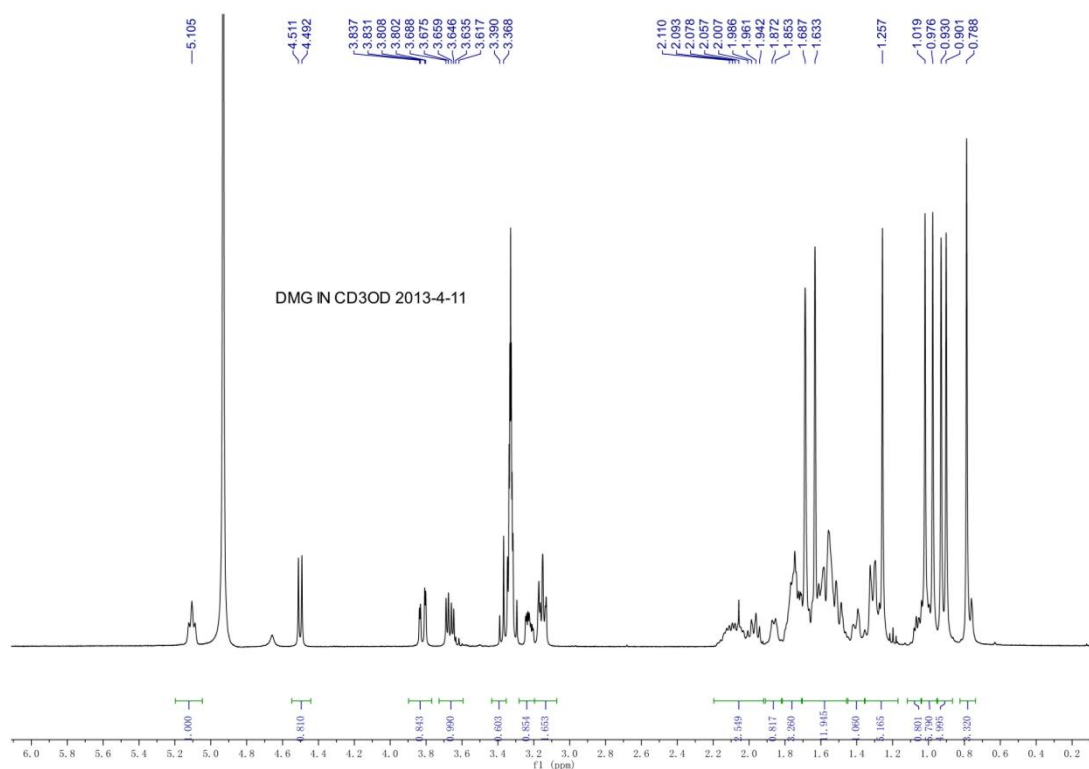

$^1\text{H-NMR}$  (400MHz, in  $\text{CD}_3\text{OD}$ )  $\delta$  5.12 (1H, t,  $J = 8.0\text{Hz}$ , H-24), 4.50 (1H, d,  $J = 7.6\text{Hz}$ , H-1'), 3.16 (m, H-3), 1.69/1.63 (6H, H-26, 27), 1.26 (3H, s, H-21), 1.02 (3H, s, H-28), 0.98 (3H, s, H-29), 0.93 (3H, s, H-30), 0.90 (3H, s, H-18), 0.79 (3H, s, H-19).

**B**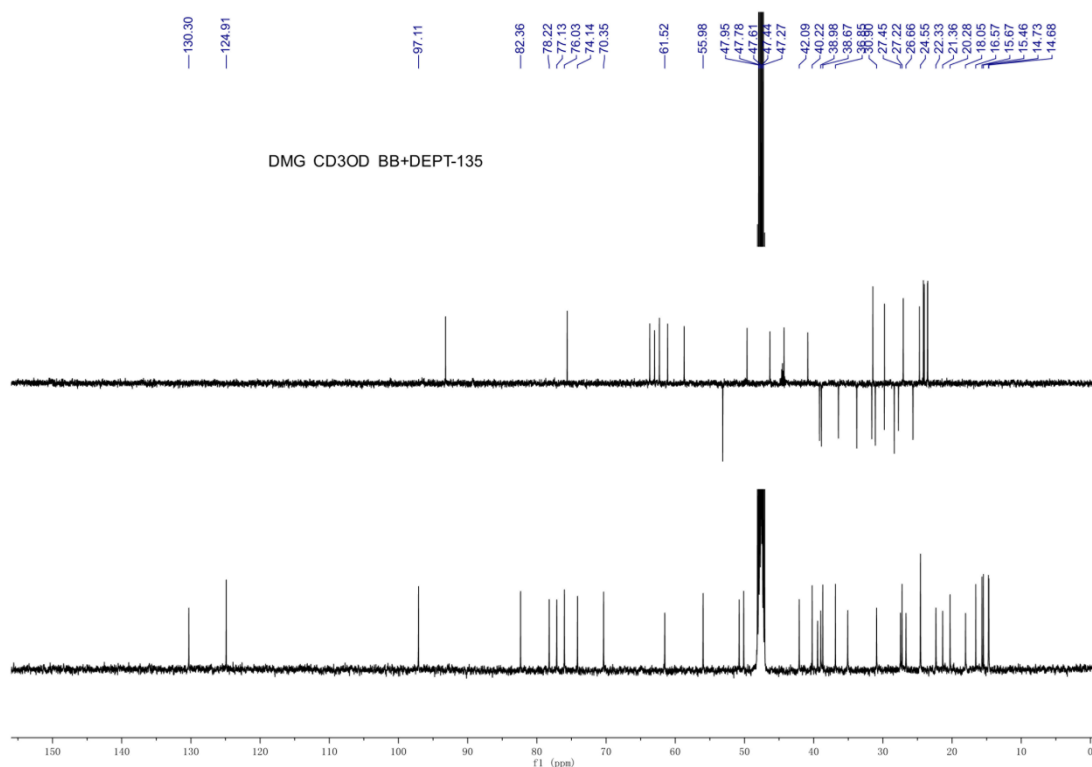

$^{13}\text{C}$ -NMR (125MHz, in  $\text{CD}_3\text{OD}$ )  $\delta$  130.3, (C-25), 124.9 (C-24), 82.4 (C-20), 78.2 (C-3), 56.0 (C-5), 50.8 (C-9), 50.1 (C-14), 47.5(C-17), 42.1 (C-13), 40.2(C-8), 39.4 (C-22), 39.0 (C-1), 38.7 (C-4), 36.9 (C-10), 35.1 (C-7), 30.9 (C-15), 27.5 (C-16), 27.2 (C-28), 26.7 (C-2), 24.6 (C-12), 24.6 (C-26), 22.3 (C-23), 21.4 (C-11), 20.3 (C-21), 18.0 (C-6), 16.6 (C-27), 15.7 (C-30), 15.5 (C-18), 14.7 (C-19 and C-29), 97.1 (C-1'), 74.1 (C-2'), 77.1 (C-3'), 70.4 (C-4'), 76.0 (C-5'), 61.5 (C-6').

C

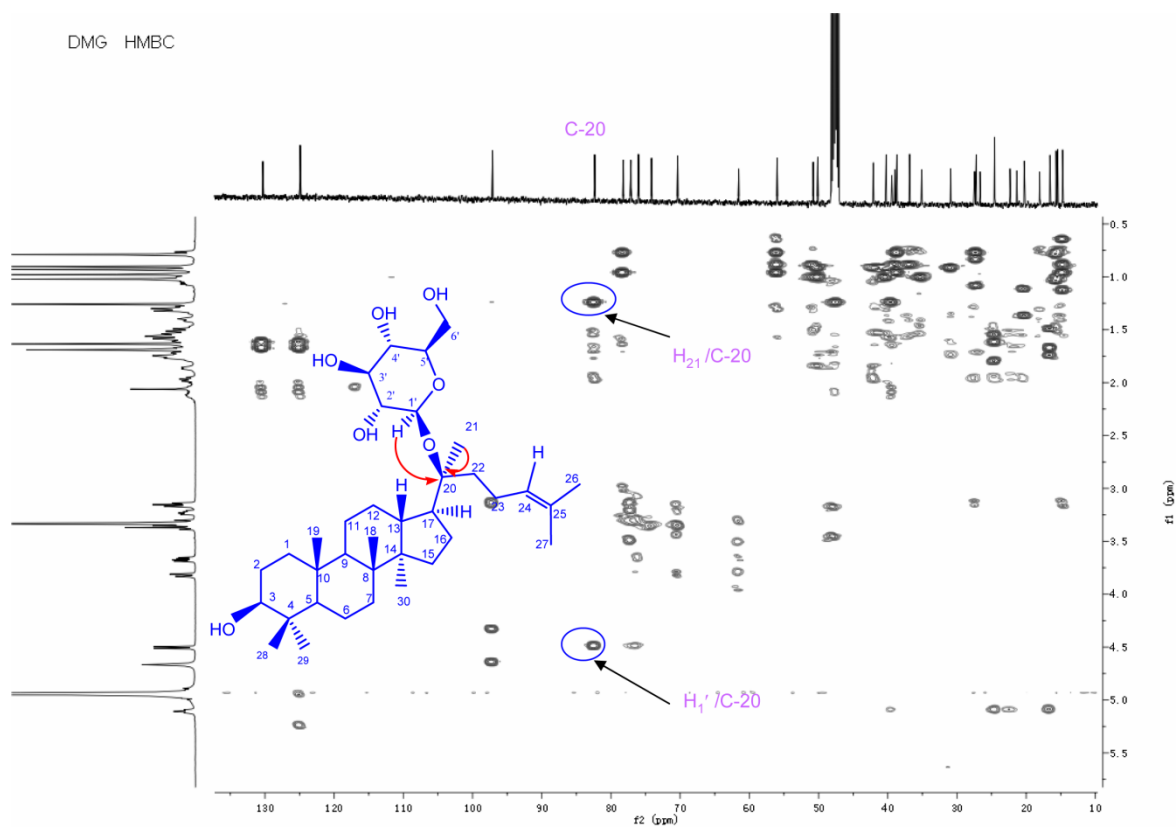

**Supplementary Information, Figure S7.** NMR spectra of DMG produced by UGTPg1 *in vitro* reaction. <sup>1</sup>H NMR (A), <sup>13</sup>C NMR (B) and 2D NMR (C).
