# Supplementary material
Source: PubMed Central journal article supplement (PMC4042165)
Supplement: cr201428x13.pdf [file cr201428x13.pdf]

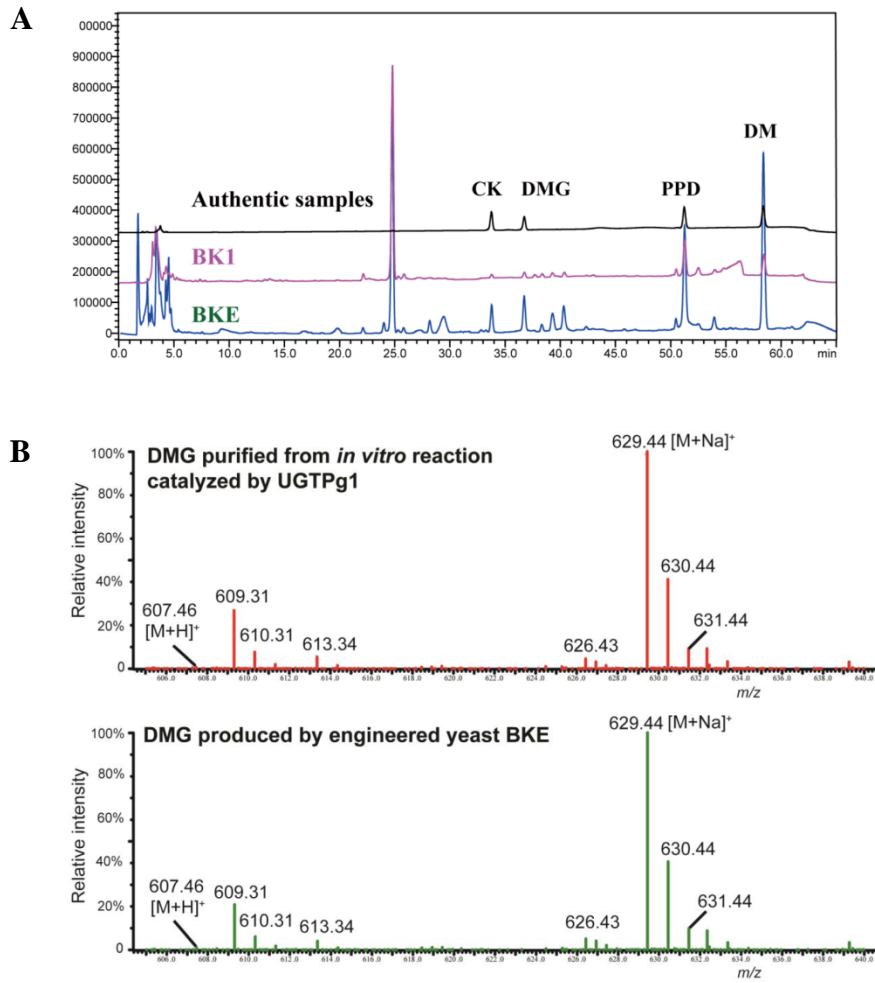

**Supplementary Information, Figure S8.** Identification of DMG produced in the genetically engineered yeast strains.

**A**, HPLC analysis of the new compound DMG, DM, PPD and CK in two yeast strains BK1 and BKE after fermentation. Black, authentic samples of CK, DMG (purified from the *in vitro* reaction using UGTPg1 to treat DM), PPD and DM; red, BK1; blue, BKE. **B**, HPLC/ESIMS analysis of DMG produced from UGTPg1 *in vitro* reaction and from the yeast strain BKE.
