# Supplementary material
Source: PubMed Central journal article supplement (PMC4042165)
Supplement: cr201428x15.pdf [file cr201428x15.pdf]

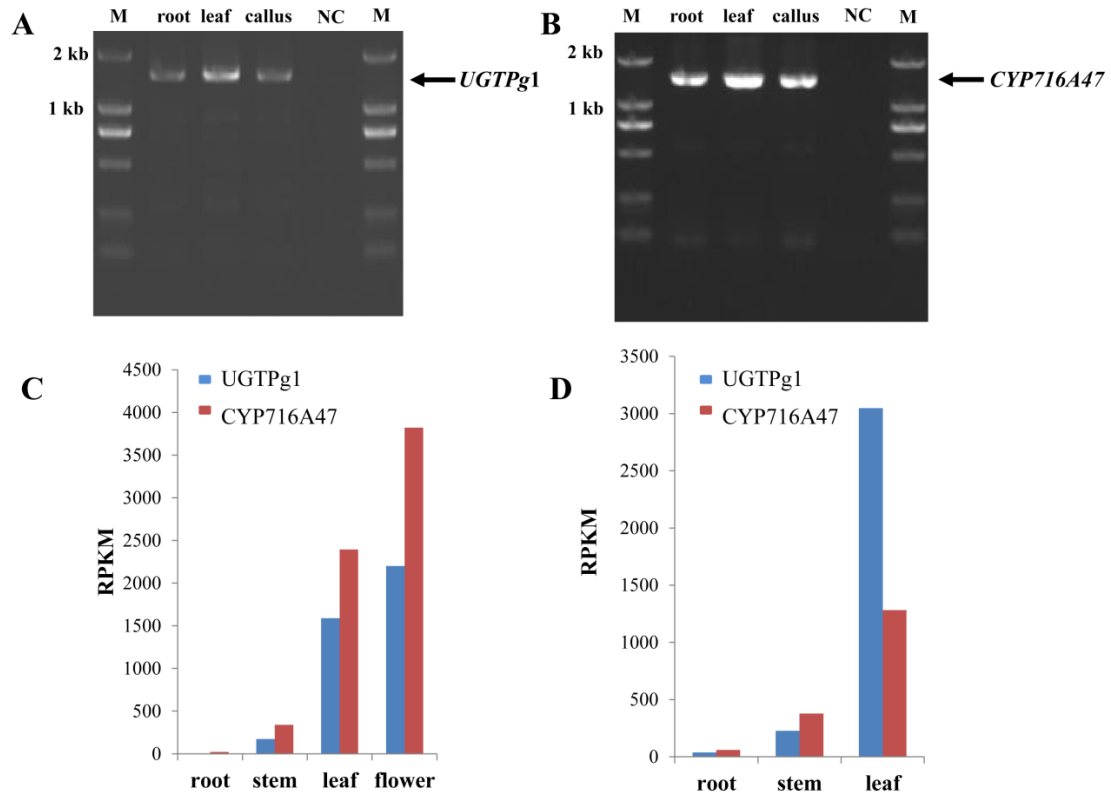

**Supplementary Information, Figure S10.** The expression profiling of *UGTPg1* and *CYP716A47* in different tissues of *P. ginseng*.

*UGTPg1* (**A**) and *CYP716A47* (**B**) were amplified by RT-PCR from the cDNA of ginseng root, leaf and callus. *UGTPg1* and *CYP716A47* expression levels in different *P. ginseng* tissues according to the sequencing datasets of *P. ginseng* collected from the NCBI database: **C**, 4-year-old ginseng (SRA accession numbers of the datasets: SRX181253, SRX181258, SRX181262, SRX181263); **D**, 5-year-old ginseng (DDBJ accession number of the datasets: ERS088917, ERS088918, ERS093423).
