# Supplementary material
Source: PubMed Central journal article supplement (PMC4042165)
Supplement: cr201428x16.pdf [file cr201428x16.pdf]

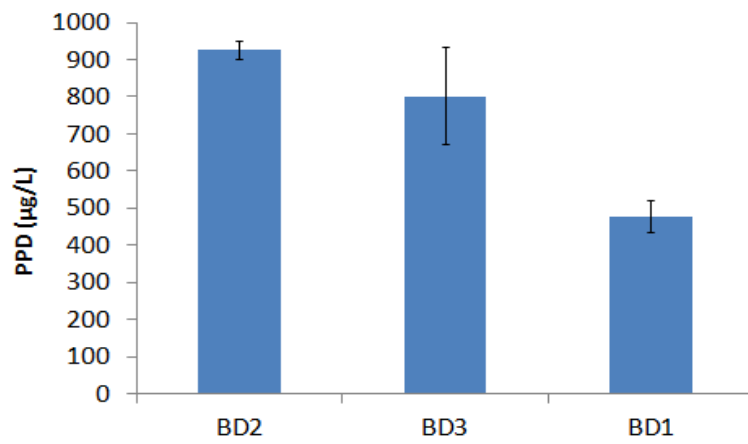

**Supplementary Information, Figure S11.** Production of PPD from the strains BD1, BD2 and BD3 using ATR2-1 from *Arabidopsis thaliana*, PgCPR1 and PgCPR2 from *Panax ginseng* as the NADPH-cytochrome P450 reductase, respectively.
